# Supplementary material for: Integrated machine learning methods identify FNDC3B as a potential prognostic biomarker and correlated with immune infiltrates in glioma
Source: PubMed Central journal article supplement (PMC9582524; doi:10.3389/fimmu.2022.1027154), 2022-10-06

Supplementary Figure 1. Genetic alterations of FNDC3B in glioma patients. (A) OncoPrint visual summary of variations on FNDC3B; (B) Summary of genetic alterations for FNDC3B in 14 glioma datasets.

(A)

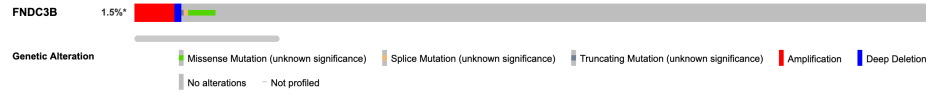

(B)

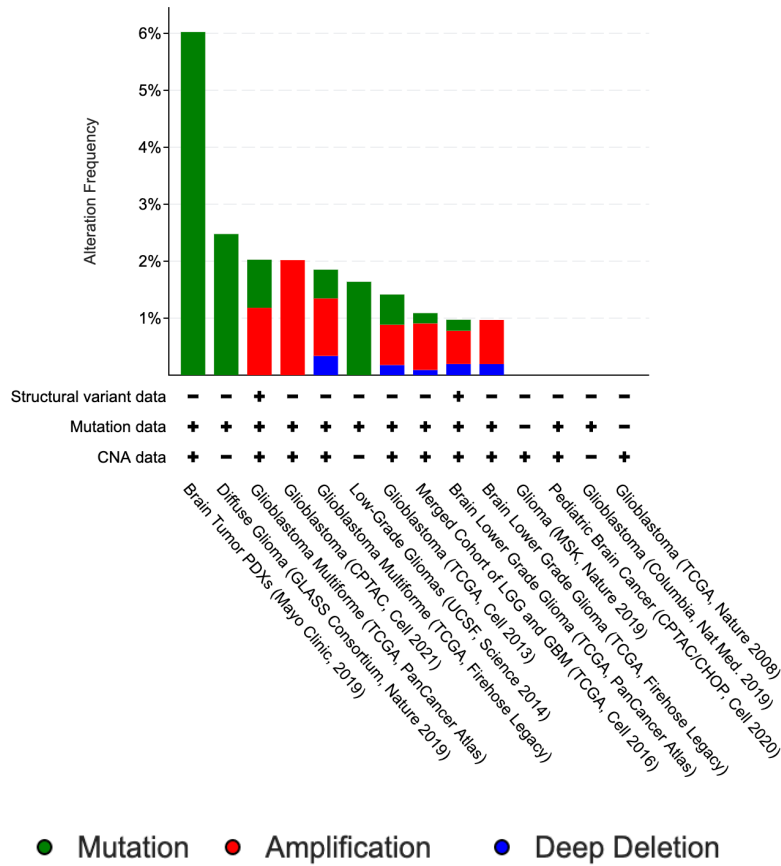

Supplementary Figure 2. FNDC3B expression profiles in human tissues and cancer cell lines. (A) The protein expression profiles of FNDC3B in human cancer tissues. (B) FNDC3B expression profiles in normal human tissues. (C) The expression of FNDC3B in glioma cell lines analyzed by Cancer Cell Line Encyclopedia (CCLE).

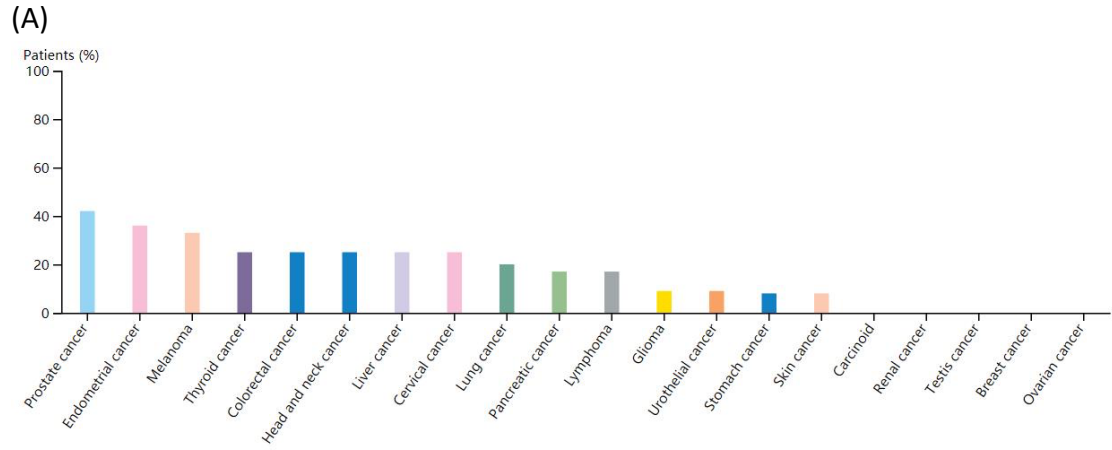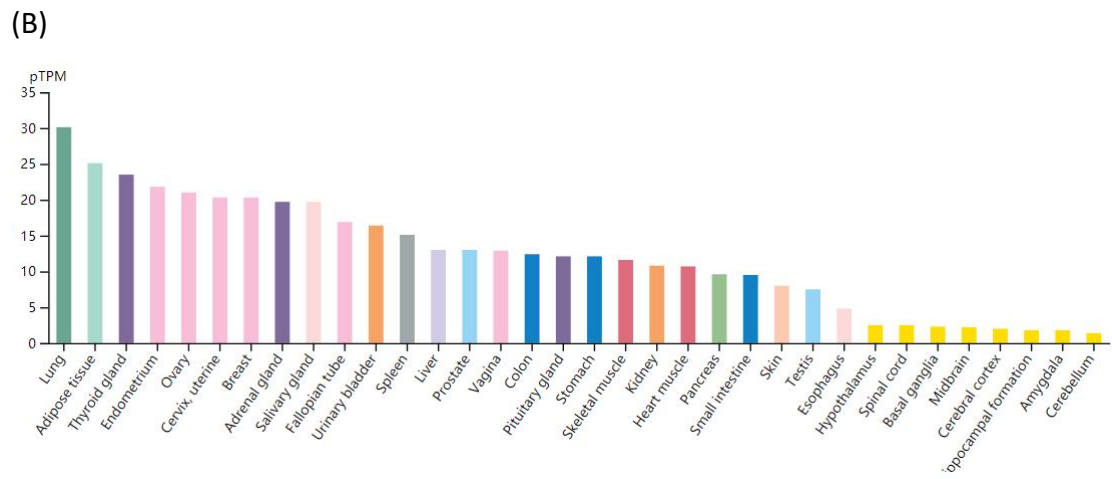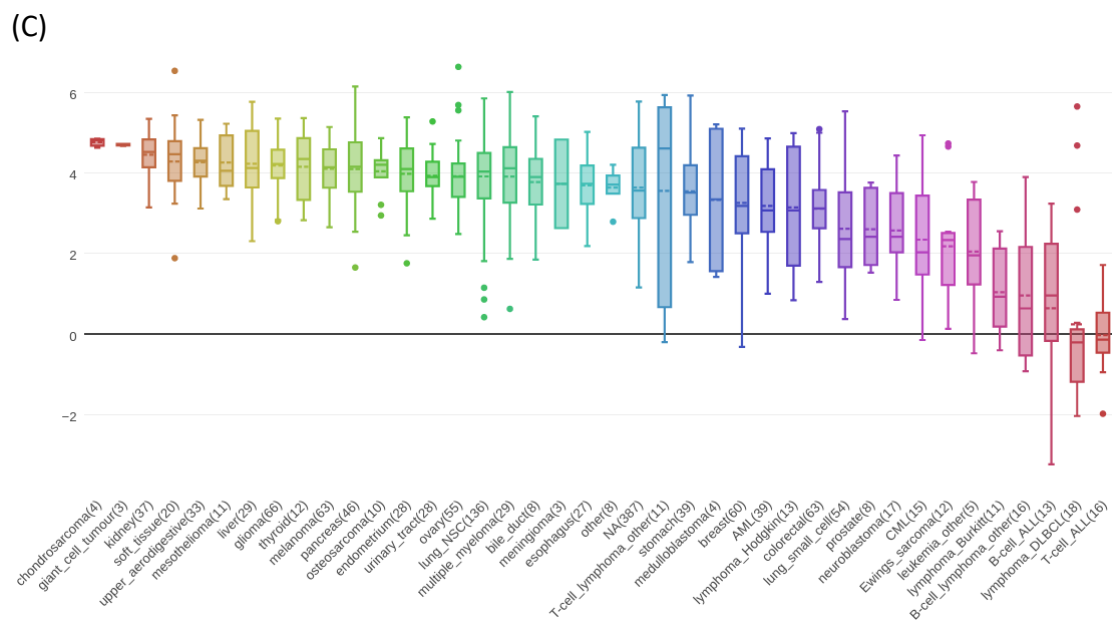

Supplementary Figure 3. Correlation of FNDC3B expression with prognostic values in diverse types of cancer. Overall survival and disease free curves comparing the high and low expression of FNDC3B in (A-B) Adrenocortical carcinoma (ACC), (C-D) Bladder Urothelial Carcinoma (BLCA), (E-F) Breast invasive carcinoma (BRCA), (G-H) Cervical squamous cell carcinoma and endocervical adenocarcinoma (CESC), (I-J) Cholangio carcinoma (CHOL), (K-L) Colon adenocarcinoma (COAD), (M-N) Lymphoid Neoplasm Diffuse Large B-cell Lymphoma (DLBC), (O-P) Esophageal carcinoma (ESCA), (QR) Glioblastoma multiforme (GBM), (S-T) Head and Neck squamous cell carcinoma (HNSC), (U-V) Kidney Chromophobe (KICH), (W-X) Kidney renal clear cell carcinoma (KIRC), (Y-Z) Kidney renal papillary cell carcinoma (KIRP), (AA-AB) Acute Myeloid Leukemia (LAML), (AC-AD) Brain Lower Grade Glioma (LGG), (AE-AF) Liver hepatocellular carcinoma (LIHC), (AG-AH) Lung adenocarcinoma (LUAD), (AI-AJ) Lung squamous cell carcinoma (LUSC), (AK-AL) Mesothelioma (MESO), (AM-AN) Ovarian serous cystadenocarcinoma (OV), (AO-AP) Pancreatic adenocarcinoma (PAAD), (AQ-AR) Pheochromocytoma and Paraganglioma (PCPG), (AS-AT) Prostate adenocarcinoma (PRAD), (AU-AV) Rectum adenocarcinoma (READ), (AW-AX) Sarcoma (SARC), (AY-AZ) Skin Cutaneous Melanoma (SKCM), (BA-BB) Stomach adenocarcinoma (STAD), (BC-BD) Testicular Germ Cell Tumors (TGCT), (BE-BF) Thyroid carcinoma (THCA), (BG-BH) Thymoma (THYM), (BI-BJ) Uterine Corpus Endometrial Carcinoma (UCEC), (BK-BL) Uterine Carcinosarcoma (UCS), (BM-BN) Uveal Melanoma (UVM).

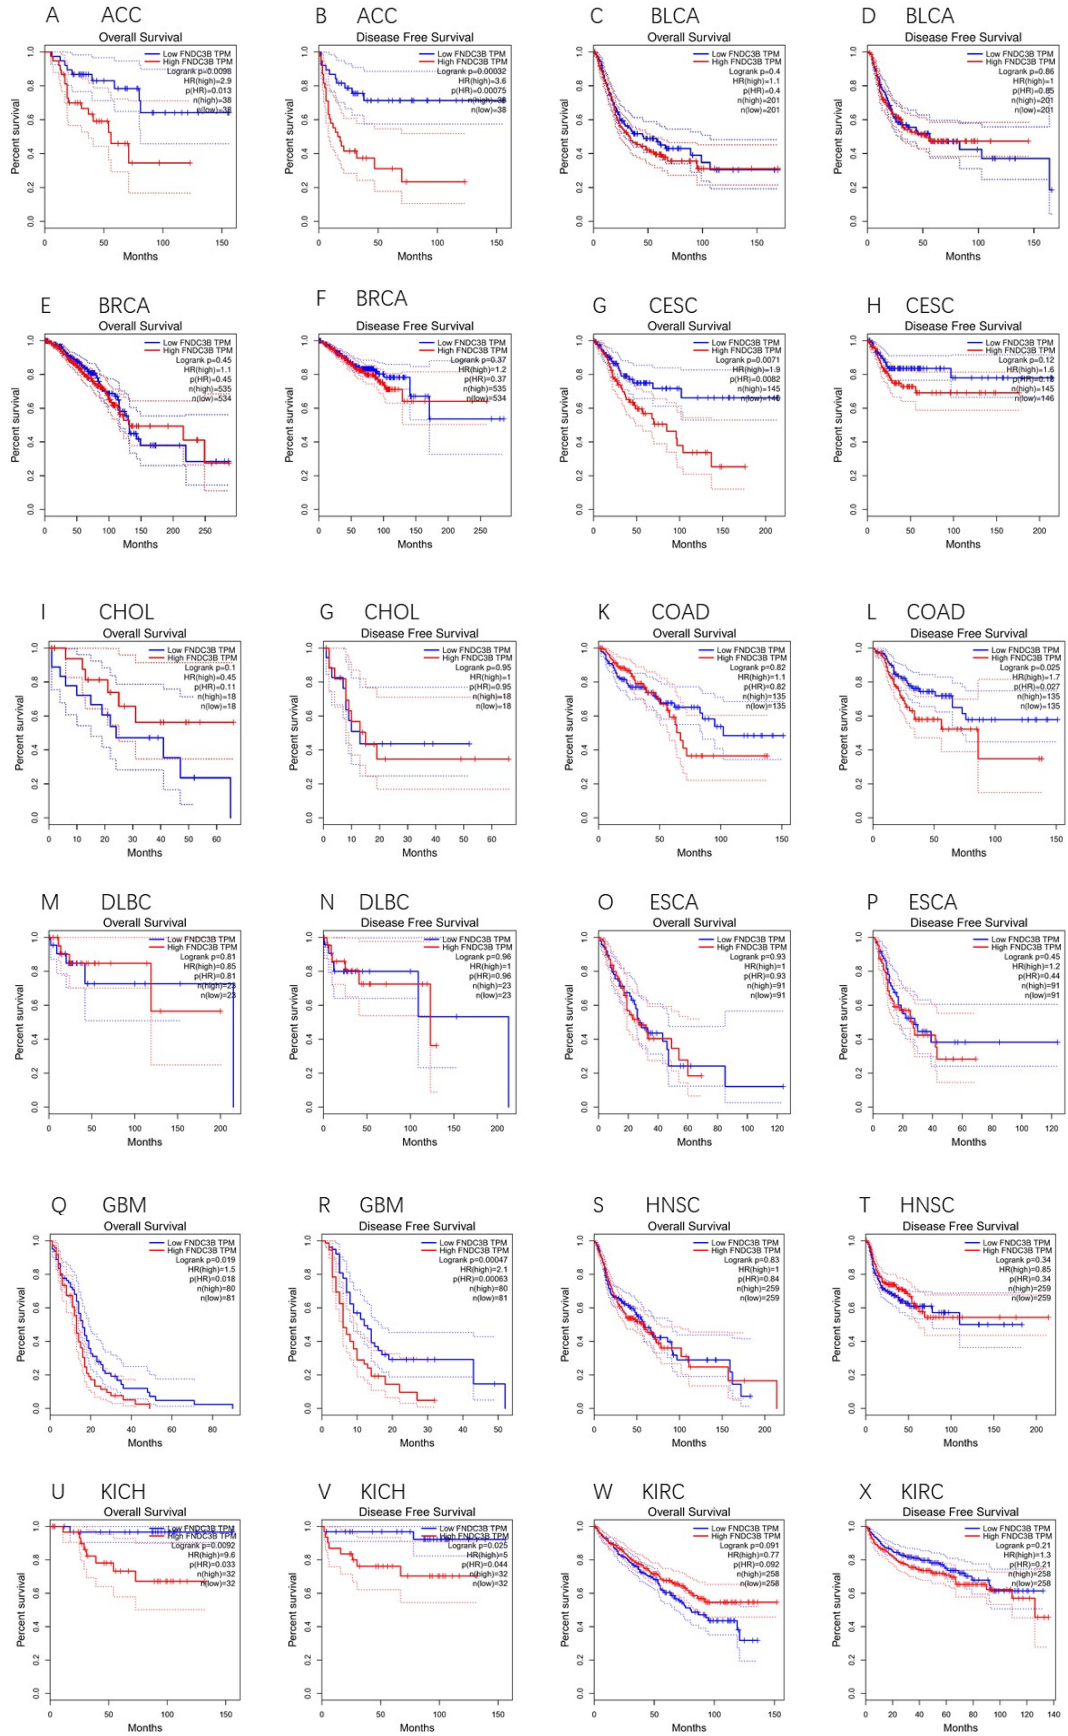

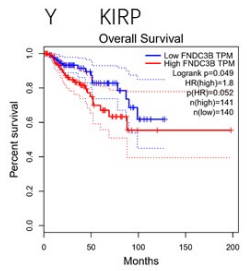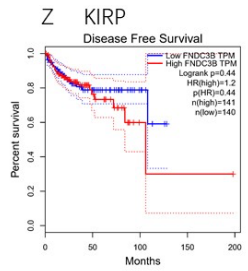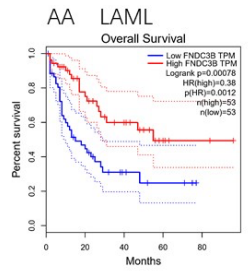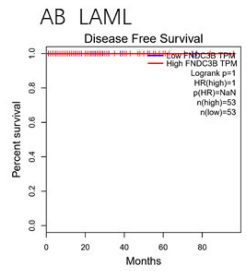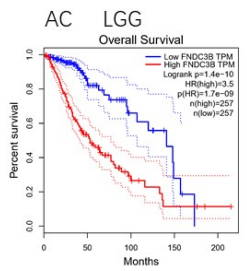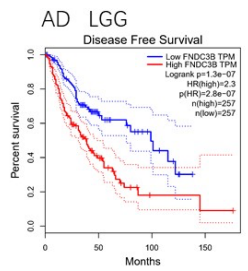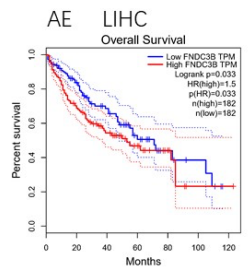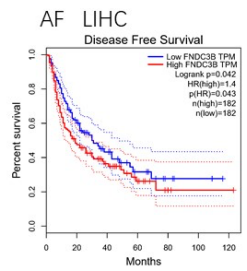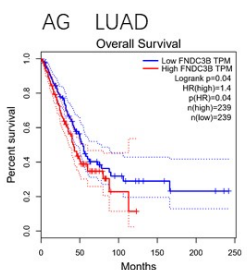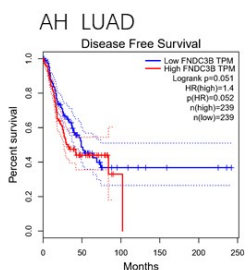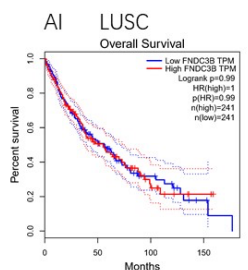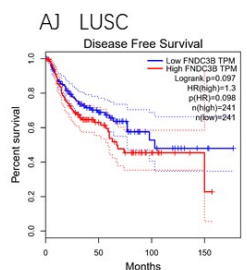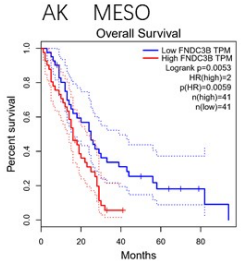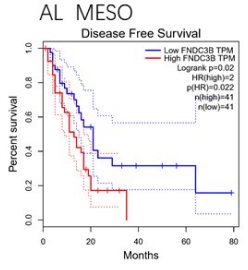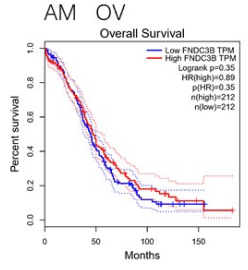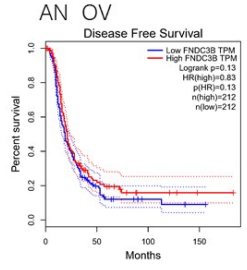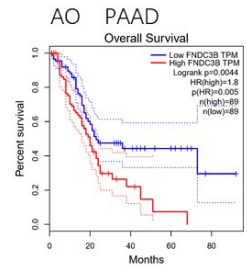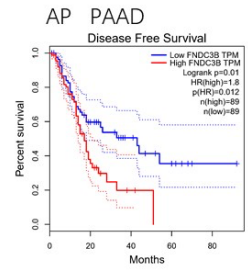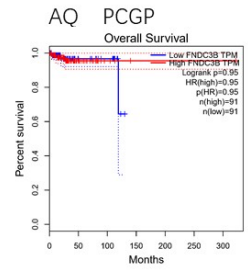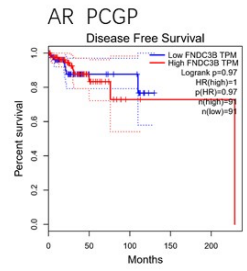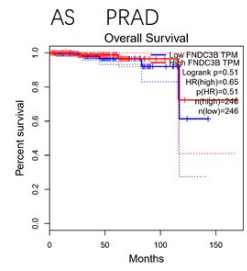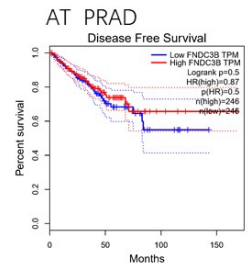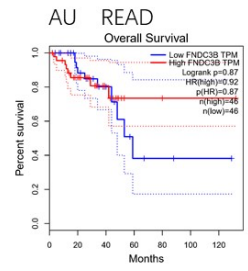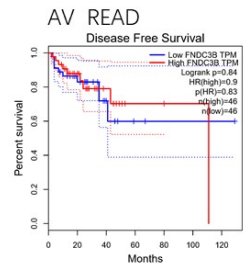

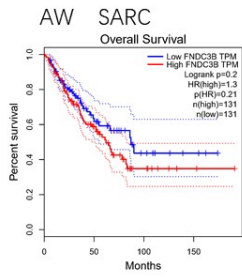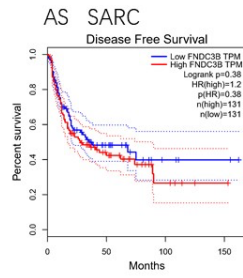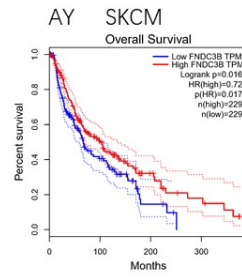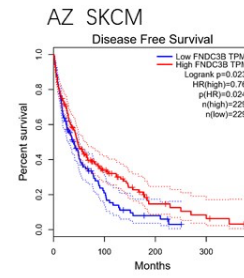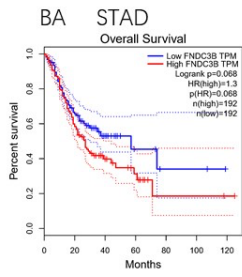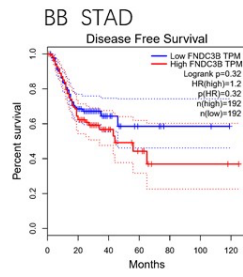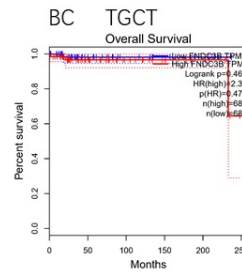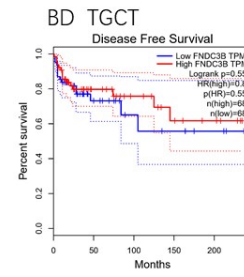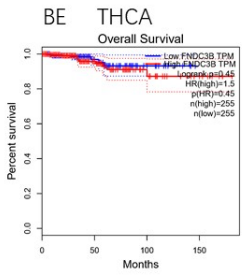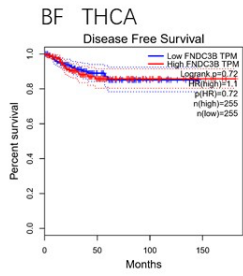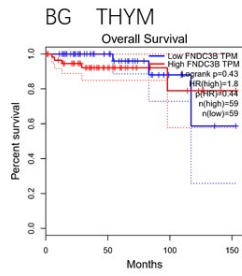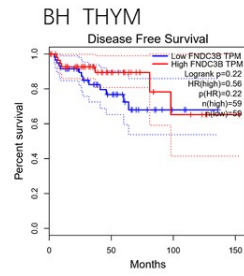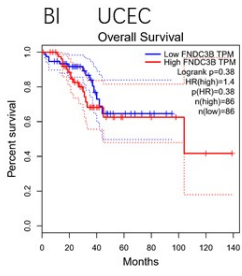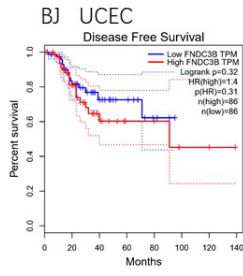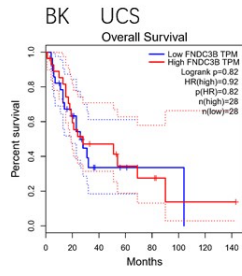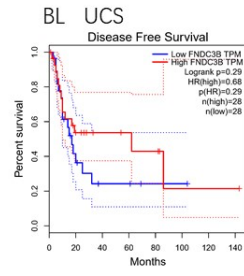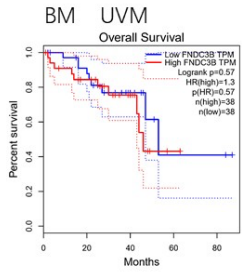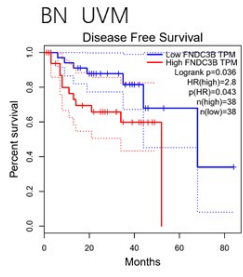

Supplementary Figure 4. Kaplan-Meier analysis of overall survival (OS) based on high vs low expression of FNDC3B in pan-glioma patients in the CGGA data sets. (A) mRNAseq\_325 data set; (B) mRNAseq\_693 data set; (C) mRNA\_array\_301 data set. The red curve represents patients with high expression of FNDC3B, and the blue curve represents patients with low expression of FNDC3B.

(A)

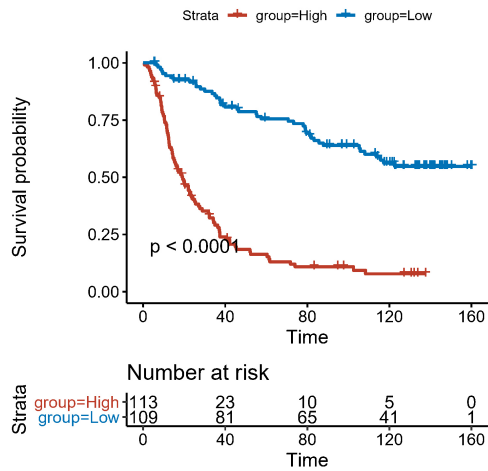

(B)

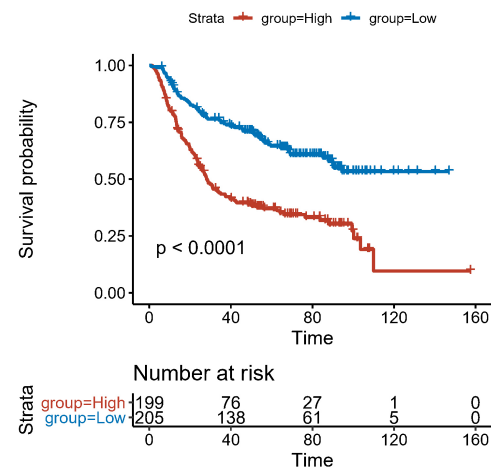

(C)

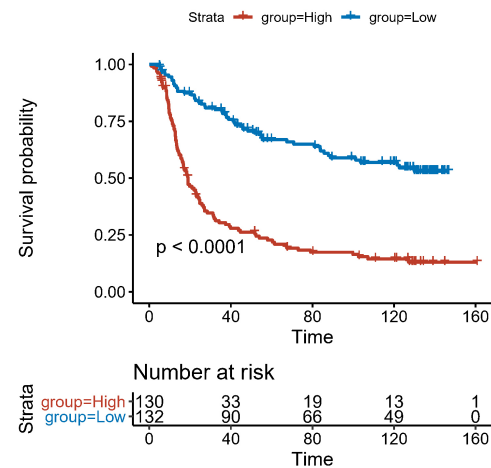

Supplementary Figure 5. Gene ontology (GO) functional annotation and hub gene analysis for the turquoise module. The top GO terms in the enrichment analysis.

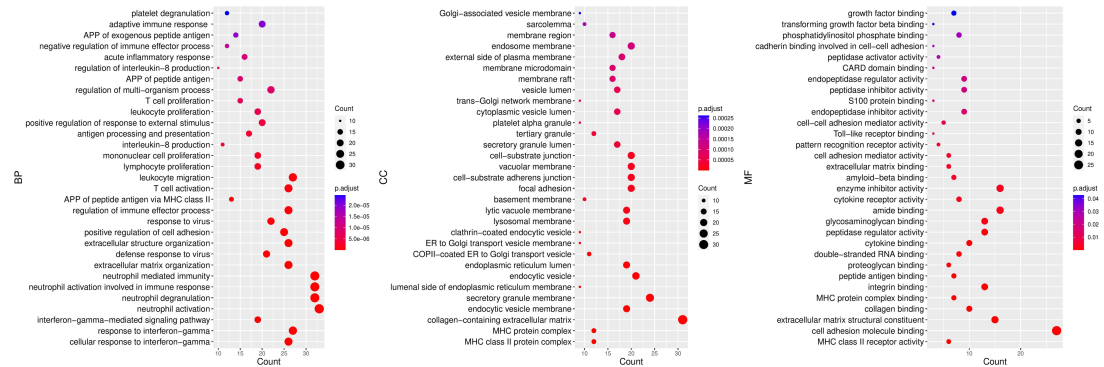



Supplementary Figure 6. 210 genes remained in the PPI network construction for the turquoise module. A total of 210 nodes and 1,061 edges were mapped for the turquoise module genes in the PPI network.

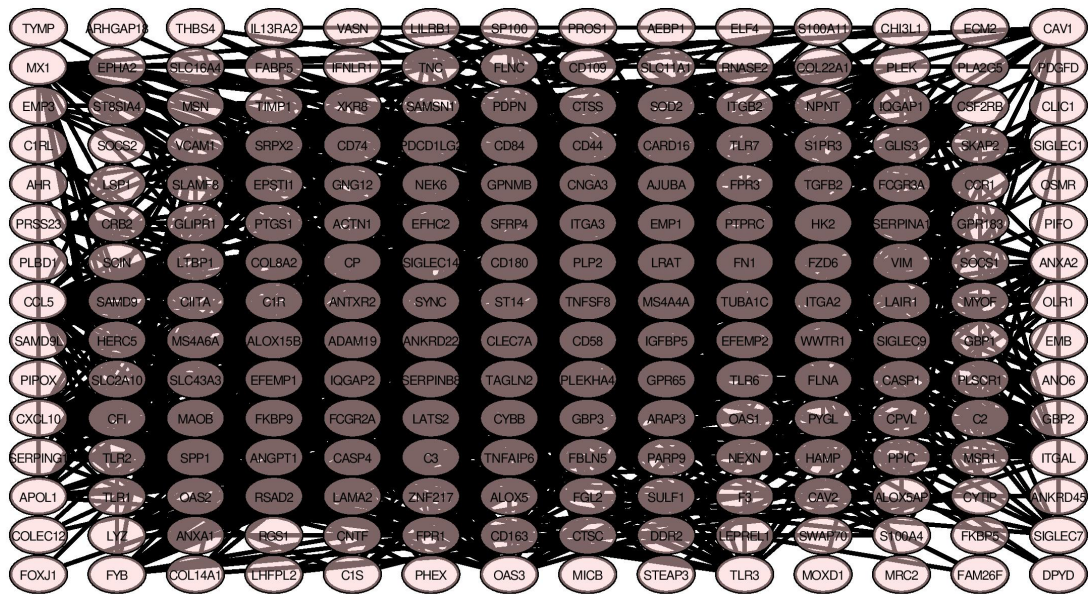

Supplementary Figure 7. High expression of the hub genes predicts shorter overall survival (OS) of low-grade glioma (LGG) patients. Kaplan-Meier curves showed that LGG patients with high expression of TLR2 (A), TLR7 (B), PTPRC (C), CCR1 (D), CCL5 (E), TLR1 (F), FN1 (G), VCAM1 (H), CXCL10 (I), and TLR6 (J) had reduced OS.

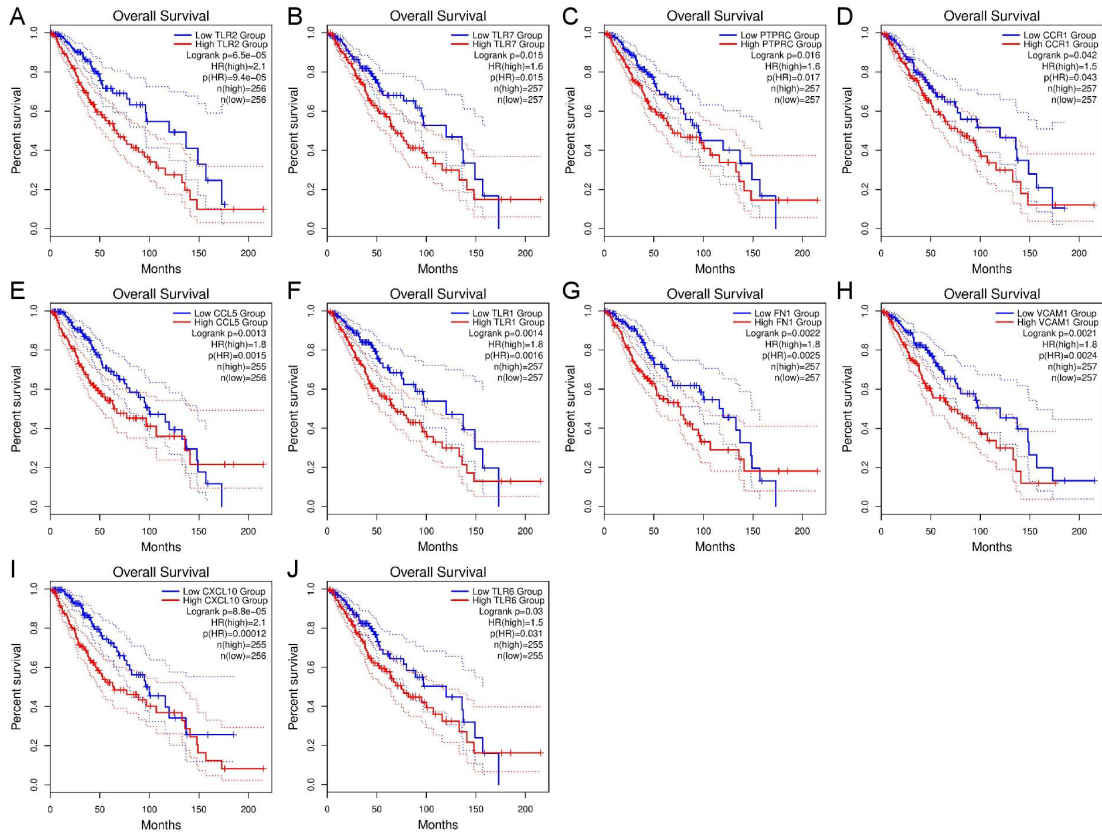

Supplement: DataSheet_1.pdf [file DataSheet_1.pdf]
